# Supplementary material for: METTL3 Facilitates Tumor Progression by COL12A1/MAPK Signaling Pathway in Esophageal Squamous Cell Carcinoma
Source: PubMed Central journal article supplement (PMC8990406; doi:10.7150/jca.66830), 2022-03-28
Supplement: jcav13p1972s1.pdf [file jcav13p1972s1.pdf]

Supplement Table. Primer sequences and reaction conditions

| Gene      | Primer sequence                                                            | Annealing temperature | Product size, bp |
|-----------|----------------------------------------------------------------------------|-----------------------|------------------|
| METTL3    | F: 5'-GAAAGACTATCTCCTGGCACTC-3'<br>R: 5'-GTACCTTTGCTTGAACCGTG-3'           | 55 °C                 | 144bp            |
| METTL14   | F: 5'-TTTCTCTGGTGTGGTTCTGG-3'<br>R: 5'-AAGTCTTAGTCTTCCCAGGATTG-3'          | 59 °C                 | 130bp            |
| WTAP      | F: 5'-TTCCCAAGAAGGTTTCGATTG-3'<br>R: 5'-TGCAGACTCCTGCTGTTGTT-3'            | 57 °C                 | 192bp            |
| FTO       | F: 5'-ACTTGGCTCCCTTATCTGACC-3'<br>R: 5'-TGTGCAGTGTGAGAAAGGCTT-3'           | 59 °C                 | 145bp            |
| ALKBH5    | F: 5'-CCCTGCTCTGAAACCCAG-3'<br>R: 5'-GTTCTCTTCCTTGCCATCTCC-3'              | 57 °C                 | 91bp             |
| YTHDF1    | F: 5'-ACCTGTCCAGCTATTACCCG-3'<br>R: 5'-TGGTGAGGTATGGAATCGGAG-3'            | 57 °C                 | 99bp             |
| YTHDF2    | F: 5'-TCTGGAAAAGGCTAAGCAGG-3'<br>R: 5'-CTTTTATTTCCCACGACCTTGAC-3'          | 55 °C                 | 146bp            |
| MAP2K1    | F: 5'-ATCTGAGGGAGAAGCACAAG-3'<br>R: 5'-CGAAGGAGTTGGCCATGGAG-3'             | 56 °C                 | 135bp            |
| CYP1B1    | F: 5'-TTCGGCCACTACTCGGAGC-3'<br>R: 5'-AAGAAGTTGCGCATCATGCT-3'              | 57 °C                 | 68bp             |
| CASP1     | F: 5'-GCTTTCTGCTCTTCCACACC-3'<br>R: 5'-TCCTCCACATCACAGGAACA-3'             | 56 °C                 | 119bp            |
| SKP2      | F: 5'-TTGCCCTGCAGACTTTGCTA-3'<br>R: 5'-CAGCTGGGTGATGGTCTCTG-3'             | 57 °C                 | 128bp            |
| AXL       | F: 5'-ACCTACTCTGGCTCCAGGATG-3'<br>R: 5'-CGCAGGAGAAAGAGGATGTC-3'            | 56 °C                 | 108bp            |
| HNRNPL    | F: 5'-TTGTGGCCCTGTCCAGAGAATT-3'<br>R: 5'-GTTTGTGTAGTCCCAAGTATCCTG-3'       | 57 °C                 | 211bp            |
| TFAM      | F: 5'-GAGCAGCTAACTCCAAGTCAG-3'<br>R: 5'-TCCGTTTCCTACTAAGCCGAG-3'           | 59 °C                 | 123bp            |
| CCNG1     | F: 5'-GTTACCGCTGAGGAGCTGCAGTC-3'<br>R: 5'-GCAGCCATCCTGGATGGATTGAG-3'       | 60 °C                 | 153bp            |
| SNRPB2    | F: 5'-TTTAAGGAACTGGGCTCATC-3'<br>R: 5'-TTTGTGAGCAAAAAGTTCAC-3'             | 51 °C                 | 138bp            |
| COL12A1   | F: 5'-TATTGTGTTCTTGACTGATGCCTCCTG-3'<br>R: 5'-AGACTTGACCTCATCGCTGTATTGC-3' | 59 °C                 | 154bp            |
| Rab11FIP1 | F: 5'-ATGAACACAACAGCCACCAA-3'<br>R: 5'-CCTTCTTGCTGATGGTCTCC-3'             | 61 °C                 | 99bp             |
| EGR1      | F: 5'-GGTCAGTGGCCTAGTGAGC-3'<br>R: 5'-GTGCCGCTGAGTAAATGGGA-3'              | 58 °C                 | 149bp            |
| GAPDH     | F: 5'-AATCCATCACCATCTTCCA-3'<br>R: 5'-TGGACTCCACGACGTACTCA-3'              | 57 °C                 | 82bp             |
